# Supplementary material
Source: PubMed Central journal article supplement (PMC8204321)
Supplement: pt1c00010_si_001.pdf [file pt1c00010_si_001.pdf]

---

## Supplementary Information

### Selective Targeting of Vascular Endothelial YAP Activity Blocks EndMT and Ameliorates Unilateral Ureteral Obstruction-Induced Kidney Fibrosis

Yafeng Ren<sup>3†</sup>, Yuwei Zhang<sup>1,2†</sup>, Lu Wang<sup>1,2†</sup>, Fuqian He<sup>4</sup>, Mengli Yan<sup>3</sup>, Xiaoheng Liu<sup>1,2</sup>, Yangying Ou<sup>1,2</sup>, Qinkai Wu<sup>5</sup>, Tao Bi<sup>1,2</sup>, Shiyuan Wang<sup>1,2</sup>, Jian Liu<sup>1,2</sup>, Bi-Sen Ding<sup>3,6,7\*</sup>, Li Wang<sup>2\*</sup>, Jie Qing<sup>1,2,3\*</sup>

<sup>1</sup>National Traditional Chinese Medicine Clinical Research Base, Affiliated Traditional Chinese Medicine Hospital, Southwest Medical University, Luzhou 646000, China

<sup>2</sup>Research Center of Integrated Traditional Chinese and Western Medicine, Affiliated Traditional Medicine Hospital, Southwest Medical University, Luzhou 646000, China

<sup>3</sup>Key Laboratory of Birth Defects and Related Diseases of Women and Children of MOE, State Key Laboratory of Biotherapy, West China Second University Hospital, Sichuan University, Chengdu 610064, China

<sup>4</sup>The Center of Gerontology and Geriatrics and National Clinical Research Center for Geriatrics, West China Hospital of Sichuan University, Chengdu 610041, China

<sup>5</sup>Michael Smith Laboratories, University of British Columbia, Vancouver V6T1Z4, Canada

<sup>6</sup>Fibrosis Research Center, Icahn School of Medicine at Mount Sinai, New York 10128, United States

<sup>7</sup>Ansary Stem Cell Institute, Weill Cornell Medicine, New York 10065, United States

\*Email: qing282420@163.com (J.Q.)

\*Email: 1999wangli@163.com (L.W.)

\*Email: dingbisen@scu.edu.cn (B.-S.D.)

†These authors contributed equally to this work

Supplementary information contains methods, three tables and one supplemental figure.

**Methods:** Cell lines and antibodies; Isolation of mouse kidney endothelial cells; RNA quantification and sequencing.

**Supplementary Information Table S1:** RNA sequencing data from kidney endothelial cells.

**Supplementary Information Table S2:** ShRNA targeting sequence.

**Supplementary Information Table S3:** All primers used for RT-PCR.

**Supplementary Information Figure S1:** Detecting the expression of renal TAZ in the mouse model of unilateral ureteral obstruction (UUO)

---

## Methods

### Cell lines and antibodies

Human umbilical vein endothelial cells (HUVECs) were purchased from iCell and cultured in primary endothelial cell culture system (PriMed-icell-002) supplemented with 10% (v/v) fetal bovine serum (FBS; Gibco). HEK293T cells were cultured in Dulbecco's modified Eagle's medium supplemented with 10% FBS, 100 U/ml penicillin and 100 µg/ml streptomycin at 37°C in a humidified incubator with 5% CO<sub>2</sub>.

Anti-YAP1 (phosphoS127) (ab76252), goat anti-rat IgG (Alexa Fluor 555) (ab150158), goat anti-rabbit IgG (Alexa Fluor 488) antibodies were purchased from Abcam. Rabbit anti-YAP1 (D8H1X, 14074, western blot) was purchased from CST. Rabbit YAP1 polyclonal antibody (13584-1-AP, immunofluorescence), Rabbit TAZ polyclonal antibody (23306-1-AP), α-SMA polyclonal antibody (14395-1-AP), FSP1 (S100A4) polyclonal antibody (16105-1-AP), Vimentin polyclonal antibody (10366-1-AP) were purchased from Proteintech. Rat anti-mouse CD31 antibody (MEC13.3, 553070) was purchased from BD Pharmingen. Goat anti-rabbit IgG secondary antibody (HRP) (31430) were purchased from Invitrogen.

### Isolation of mouse kidney endothelial cells

The kidney tissue was treated as previously described, with some modifications <sup>1</sup>. For isolation of mouse kidney endothelial cells by magnetic beads, the suspensions were incubated with Dynabeads® Magnetic beads (Invitrogen) coated with rat anti-mouse CD31 antibodies for 1 h at 4°C with constant gentle tilting. Bead-bound cells were collected using a magnet: the free beads were washed away, while bead-bound cells representing kidney endothelial cells were retained.

### RNA quantification and sequencing

Total cellular RNA was isolated with TRIzol reagent according to standard protocols. One-step qRT-PCR was performed with QuantiTect SYBR Green RT-PCR kit (Qiagen). The primers used for qRT-PCR are displayed in Supporting Information.

The total cellular RNA from mouse kidney endothelial cells was isolated with TRIzol reagent, and sent to Beijing Genomics Institute (BGI) for RNA-sequencing analysis. Sequenced reads were aligned to the *Mus musculus* reference genome (GRCm38.p5) with HISAT2 (version 2.1.0) <sup>2</sup>, and the aligned reads were quantified to

---

obtain mRNA expression levels using HTSeq-count (version 0.9.1) <sup>3</sup>. DESeq2, a R/Bioconductor package, was used to identify differentially expressed genes across the samples<sup>4</sup>.

## Reference

- [1] Ramachandran, P., Dobie, R., Wilson-Kanamori, J. R., Dora, E. F., Henderson, B. E. P., Luu, N. T., Portman, J. R., Matchett, K. P., Brice, M., Marwick, J. A., Taylor, R. S., Efremova, M., Vento-Tormo, R., Carragher, N. O., Kendall, T. J., Fallowfield, J. A., Harrison, E. M., Mole, D. J., Wigmore, S. J., Newsome, P. N., Weston, C. J., Iredale, J. P., Tacke, F., Pollard, J. W., Ponting, C. P., Marioni, J. C., Teichmann, S. A., and Henderson, N. C. (2019) Resolving the fibrotic niche of human liver cirrhosis at single-cell level, *Nature* 575, 512-518. Doi: 10.1038/s41586-019-1631-3.
- [2] Kim, D., Langmead, B., and Salzberg, S. L. (2015) HISAT: a fast spliced aligner with low memory requirements, *Nature methods* 12, 357-360. Doi: 10.1038/nmeth.3317.
- [3] Anders, S., Pyl, P. T., and Huber, W. (2015) HTSeq--a Python framework to work with high-throughput sequencing data, *Bioinformatics* 31, 166-169. Doi: 10.1093/bioinformatics/btu638.
- [4] Love, M. I., Huber, W., and Anders, S. (2014) Moderated estimation of fold change and dispersion for RNA-seq data with DESeq2, *Genome biology* 15, 550. Doi: 10.1186/s13059-014-0550-8.

---

**Supplementary Information Table S1:** RNA sequencing data from kidney endothelial cells. (Separate document)

**Supplementary Information Table S2:** ShRNA targeting sequences are as following.

|            |                                                                     |
|------------|---------------------------------------------------------------------|
| shNC       | 5'-CCGGTTCTCCGAACGTGTCACGTCTCGAGACGTGACAC<br>GTTCGGAGAATTTTT-3'     |
| shF2RL1-1  | 5'-CCGGCGAAACCTCATCTCTACTAAACTCGAGTTTAGTA<br>GAGATGAGGTTTCGTTTTT-3' |
| sh F2RL1-2 | 5'-CCGGGCTCTTTGTAATGTGCTTATTCTCGAGAATAAGC<br>ACATTACAAAGAGCTTTTT-3" |
| shF2RL1-3  | 5'-CCGGCCACTGTTAAGACCTCCTATTCTCGAGAATAGGA<br>GGTCTTAACAGTGGTTTTT-3' |
| sh F2RL1-4 | 5'-CCGGCCTCTAAAGGAAGAAGCCTTACTCGAGTAAGGC<br>TTCTTCCTTTAGAGGTTTTT-3' |
| shYAP      | 5'-CCGGCCCAGTTAAATGTTACCAATCTCGAGATTGGTG<br>AACATTTAACTGGGTTTTT-3'  |

---

**Supplementary Information Table S3:** All primers used for RT-PCR are as following.

|                   |                                   |
|-------------------|-----------------------------------|
| GAPDH-realtime-F  | 5'-CCCACTCCTCCACCTTTGACG-3'       |
| GAPDH- realtime-R | 5'-CACCACCCTGTTGCTGTAGCCA-3'      |
| F2RL1-realtime-F  | 5'- TGCTAGCAGCCTCTCTCTCC -3'      |
| F2RL1-realtime-R  | 5'- CCAGTGAGGACAGATGCAGA -3'      |
| IL1b-realtime-F   | 5'- CTTCGAGGCACAAGGCACAA -3'      |
| IL1b-realtime-R   | 5'- TTCACTGGCGAGCTCAGGTA -3'      |
| IL6-realtime-F    | 5'- CTCAATATTAGAGTCTCAACCCCCA -3' |
| IL6-realtime-R    | 5'- GAGAAGGCAACTGGACCGAA -3'      |
| CXCL2-realtime-F  | 5'- TGTGACGGCAGGGAAATGTA -3'      |
| CXCL2-realtime-R  | 5'- TCTGCTCTAACACAGAGGGAAAC -3'   |

---

## Supplementary Figures

### Supplementary Figure S1

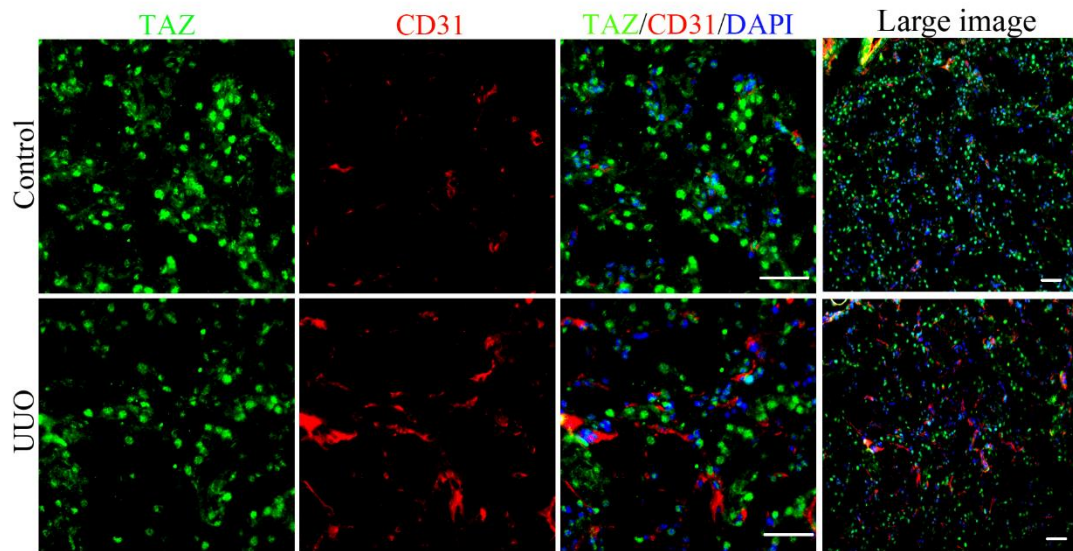

#### Supplementary Figure S1.

**Detecting the expression of renal TAZ in the mouse model of unilateral ureteral obstruction (UUO).** Co-staining of UUO or control kidneys sections for TAZ and the vascular endothelial marker CD31.
